# Supplementary figures and images for: Effects of Pectin on the Physicochemical Properties and Freeze-Thaw Stability of Waxy Rice Starch
Source: MDPI journal article supplement (doi:10.3390/foods10102419), 2021-10-13

## Supplementary material

**Figure S1**

Rapid Visco-Analyzer (RVA) pasting profiles of PEC solution (0.5%, w/v).

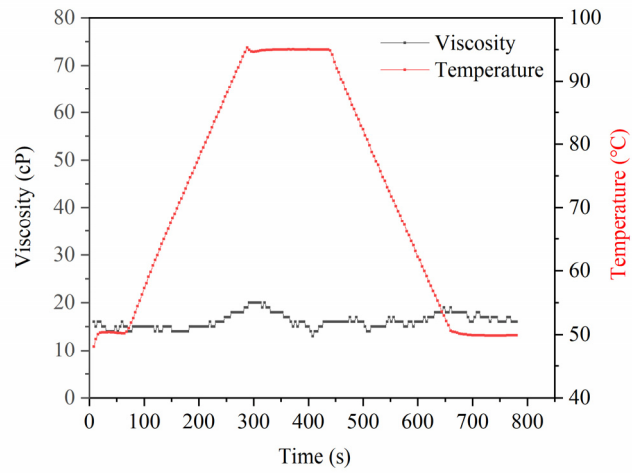

Supplement: s1 [file s1]
